# Supplementary material for: Small RNA populations revealed by blocking rRNA fragments in Drosophila melanogaster reproductive tissues
Source: PLoS One. 2018 Feb 23;13(2):e0191966. doi: 10.1371/journal.pone.0191966 (PMC5825024; doi:10.1371/journal.pone.0191966)
Supplement: S1 Table — (XLSX) [file pone.0191966.s002.xlsx]

## Sheet: S1 Table caption
	S1Table. Overview table showing the sequencing characteristics of the blocked and non-blocked sRNA-seq samples
	For each sample, the total number of sequenced reads, the number and proportion of reads accepted (i.e. with no unassigned nucleotides or Ns), number and proportion of reads for which the adapter was trimmed (Adp), number and proportion of reads accepted ('N', i.e. with lengths > 16nt) after the trimming of the HD signatures, assigned 4nt at the 5’ and 3’ end of a sRNA, and the overall sample com…

## Sheet: S1 Table
	S1 Table
	Sex	Sample	Total reads	Accepted reads	% Accepted	with Adp	% Adp	with N	% N	NR	C
	Female	HT	12310233	12290054	0.998361	12109227	0.985287	12107224	0.999835	278413	0.0229956
	Female	AB	25990391	25920191	0.997299	21004705	0.810361	20857580	0.992996	294081	0.0140995
	Male	AB blocked	8922309	8882240	0.995509	8822259	0.993247	7661351	0.868411	961217	0.125463
	Male	AB non-blocked	9549977	9506201	0.995416	9445953	0.993662	9351536	0.990005	530364	0.0567141
	Male	AGT blocked	10698595	10651522	0.9956	10509062	0.986625	10502799	0.999404	954900	0.0909186
	Male	AGT non-blocked	35458442	35295442	0.995403	35040119	0.992766	35038133	0.999943	461737	0.0131781
	Male	AG blocked replicate 1	43240674	43182924	0.998664	41698853	0.965633	41432259	0.993607	1635222	0.0394674
	Male	AG blocked replicate 2	47201838	47139329	0.998676	45656384	0.968541	42836206	0.93823	1757085	0.0410187
	Male	AG non-blocked replicate 1	41743942	41684738	0.998582	40990292	0.983341	40733616	0.993738	206537	0.00507043
	Male	AG non0-blocked replicate 2	50736151	50664198	0.998582	49708728	0.981141	49702392	0.999873	416995	0.00838984
