# Supplementary material for: Small RNA populations revealed by blocking rRNA fragments in Drosophila melanogaster reproductive tissues
Source: PLoS One. 2018 Feb 23;13(2):e0191966. doi: 10.1371/journal.pone.0191966 (PMC5825024; doi:10.1371/journal.pone.0191966)
Supplement: S3 Table — (XLSX) [file pone.0191966.s004.xlsx]

## Sheet: S3 Table caption
	S3 Table. Sequences of the blocking oligos
	Sequences of 8 abundant rRNA fragments in D. melanogaster sRNA library preparations. The blocking oligos were designed as the reverse complementary sequence, with 5’-AC6 and 3’-DDC modified ends.

## Sheet: S3 Table
		S3 Table
		Contaminating sequence	Genomic	Blocking Oligo sequence
			position
		TGCTTGGACTACATATGGTTGAGGGTTGTA	2S rRNA	AC6-TACAACCCTCAACCATATGTAGTCCAAGCA-DDC
		ATTTTGAACGCATATCGCAGTCCATGCTG	5.8S rRNA 3'	AC6-CAGCATGGACTGCGATATGCGTTCAAAAT-DDC
		AACTCTAAGCGGTGGATCACTCGGCT	5.8S rRNA 5'	AC6-AGCCGAGTGATCCACCGCTTAGAGTT-DDC
		CGCTTGGGAACACCGCGTGTTGTTGGCCT	5S rRNA	AC6-AGGCCAACAACACGCGGTGTTCCCAAGCG-DDC
		ACAACCTCAACTCATATGGGACTACCC	28S rRNA 5'	AC6-GGGTAGTCCCATATGAGTTGAGGTTGT-DDC
		GAAGCTTATCCTTTGCTTGATGATTCGA	28S rRNA 3'	AC6-TCGAATCATCAAGCAAAGGATAAGCTTC-DDC
		ATCTAGCGAAACCACAGCCAAGGGAACG	28S middle	AC6-CGTTCCCTTGGCTGTGGTTTCGCTAGAT-DDC
		AAATAATCGAATGAGACCTTGGAGGACT	28S first half	AC6-AGTCCTCCAAGGTCTCATTCGATTATTT-DDC
